# Supplementary material for: Endogenously produced catecholamines improve the regulatory function of TLR9-activated B cells
Source: PubMed Central journal article supplement (PMC8786184; doi:10.1371/journal.pbio.3001513), 2022-01-24

# S9 Figure

**A**

Gating strategy T2-MZP B cells

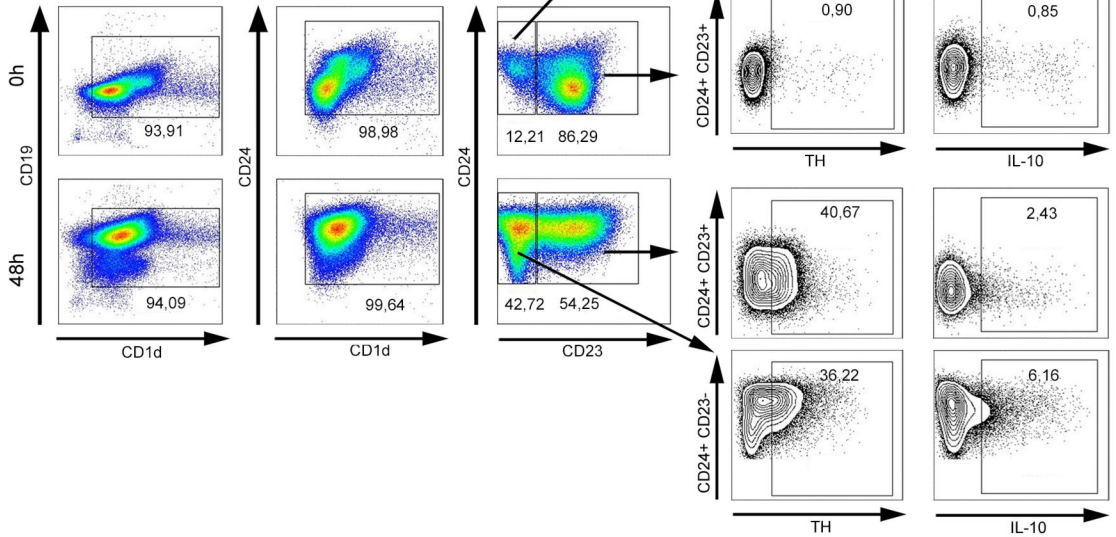

**B**

Gating strategy for plasmablasts

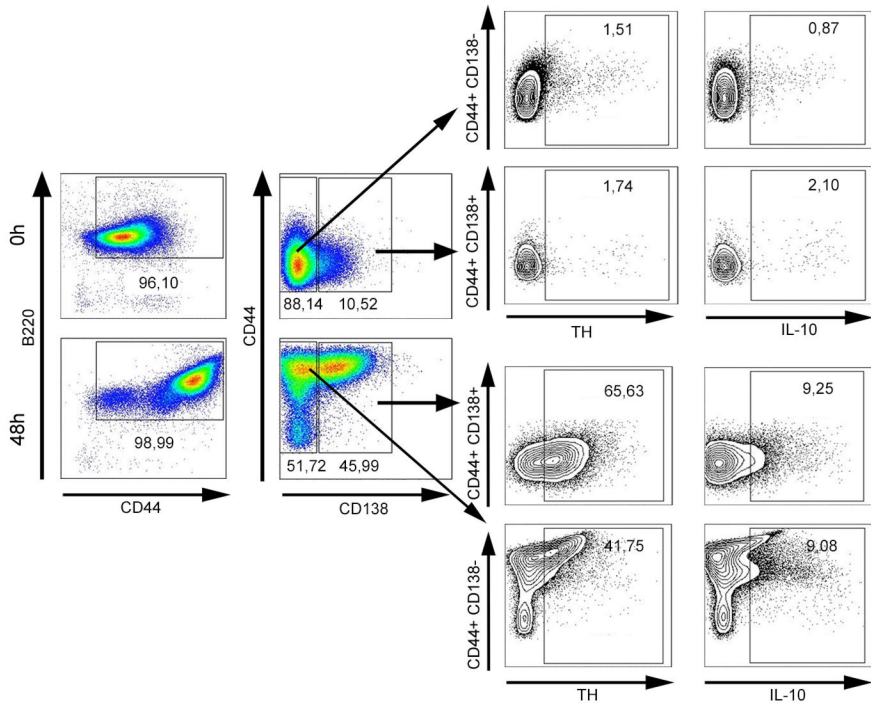

Supplement: pbio.3001513.s010.pdf [file pbio.3001513.s010.pdf]
