# Supplementary material for: Endogenously produced catecholamines improve the regulatory function of TLR9-activated B cells
Source: PubMed Central journal article supplement (PMC8786184; doi:10.1371/journal.pbio.3001513), 2022-01-24

# S10 Figure

## A

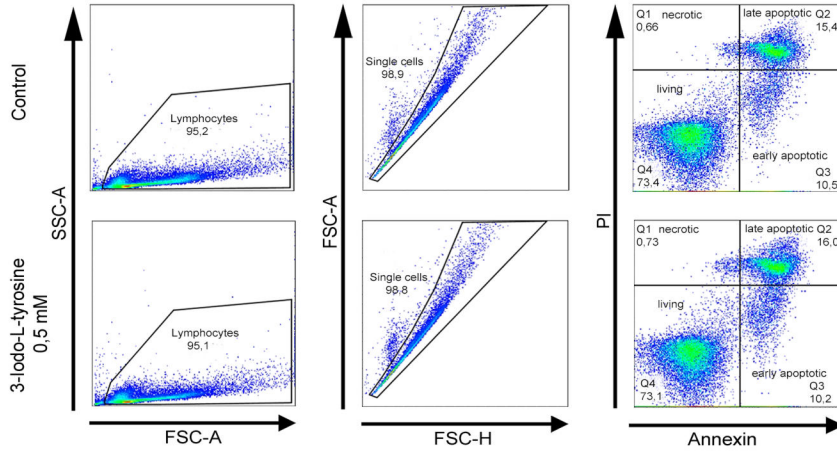

## B

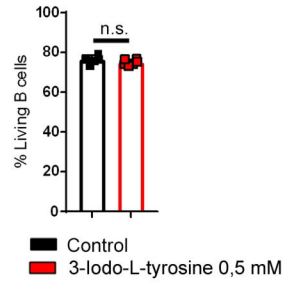

Supplement: pbio.3001513.s011.pdf [file pbio.3001513.s011.pdf]
