# Supplementary material for: Endogenously produced catecholamines improve the regulatory function of TLR9-activated B cells
Source: PubMed Central journal article supplement (PMC8786184; doi:10.1371/journal.pbio.3001513), 2022-01-24

# S11 Figure

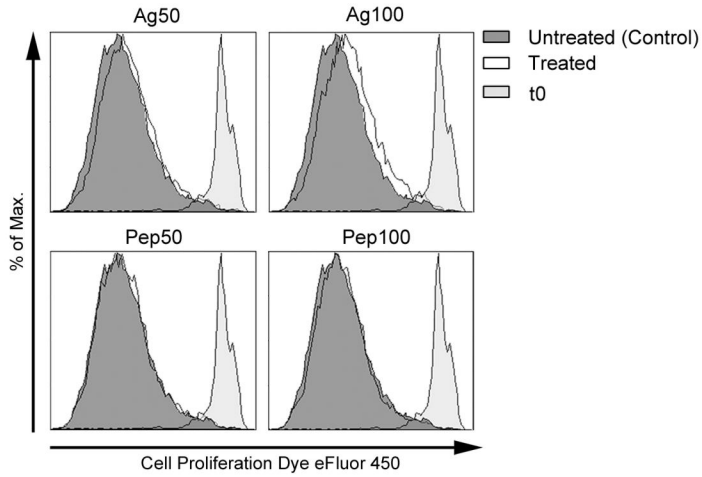

Ag50/100: Collagen-II (CII) antigen 50µg/ml or 100µg/ml

Pep50/100: Collagen-II (CII) peptide 50µg/ml or 100µg/ml

## Pulsing with Collagen-II

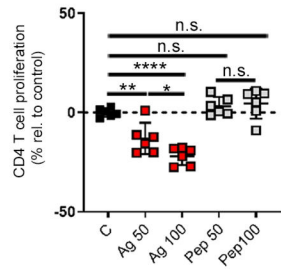

Supplement: pbio.3001513.s012.pdf [file pbio.3001513.s012.pdf]
