# Supplementary material for: Endogenously produced catecholamines improve the regulatory function of TLR9-activated B cells
Source: PubMed Central journal article supplement (PMC8786184; doi:10.1371/journal.pbio.3001513), 2022-01-24
Supplement: pbio.3001513.s013.pdf [file pbio.3001513.s013.pdf]

# S12 Figure

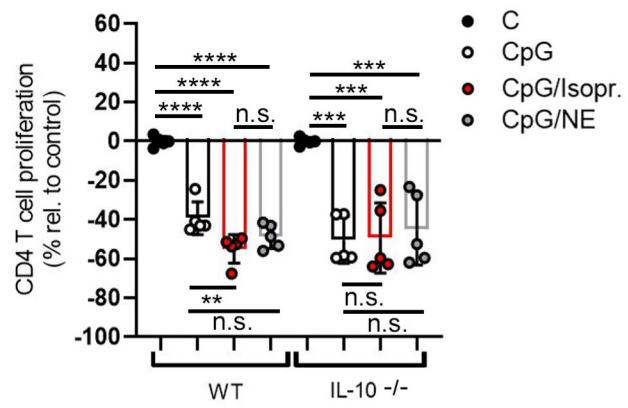

## Proliferation Index (PI)

|            | WT            | IL-10 <sup>-/-</sup> |
|------------|---------------|----------------------|
| C          | 2.658 ± 0.267 | 2.778 ± 0.086        |
| CpG        | 2.090 ± 0.232 | 2.146 ± 0.165        |
| CpG/Isopr. | 2.008 ± 0.237 | 2.164 ± 0.207        |
| CpG/NE     | 2.032 ± 0.239 | 2.184 ± 0.208        |
